# Supplementary material
Source: PubMed Central journal article supplement (PMC3004313)

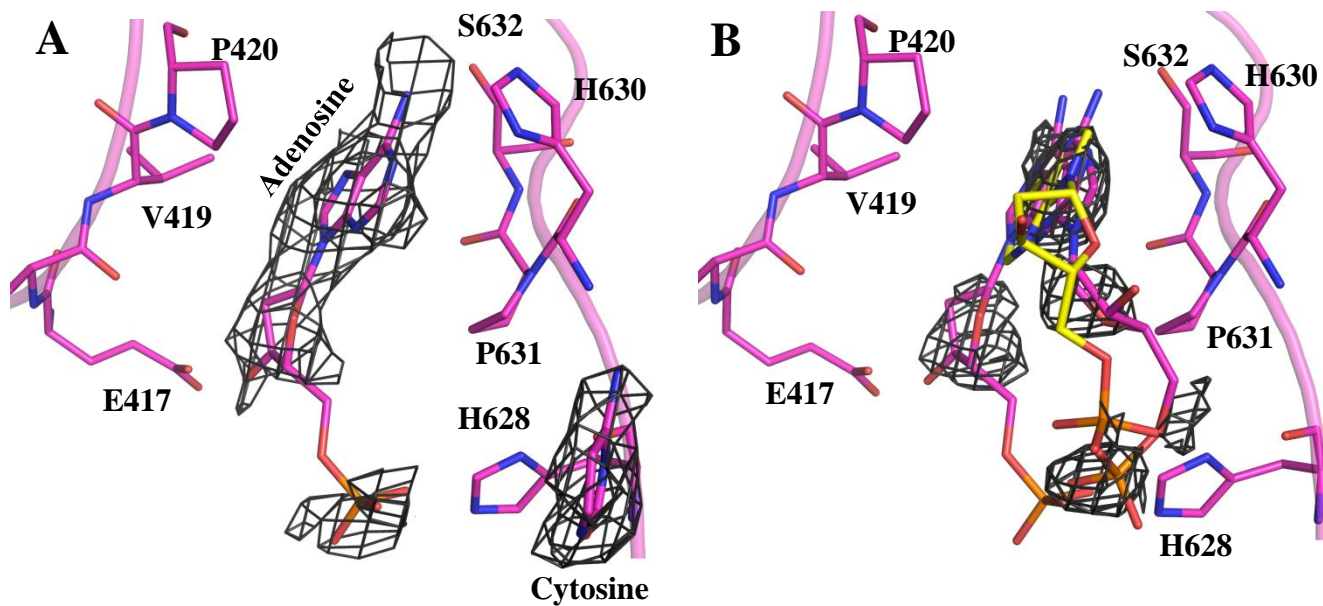

Supplement: supp_84_24_12945__1.pdf [file supp_84_24_12945__1.pdf]
